# Supplementary material
Source: Springer Nature journal article supplement (https://www.springermedizin.de/resource/supplementary/12961_2014_326_MOESM1_ESM.pdf/9571062)
Supplement: MOESM1 [file 9571062]

Activities:

1. Community profiling follow-up
2. Understanding information & knowledge use by PHC facility managers
3. Leadership development support

Activities:

1. Community profiling follow-up
2. Understanding PHC facility managers' identity transition
3. Group coaching support for PHC facility managers

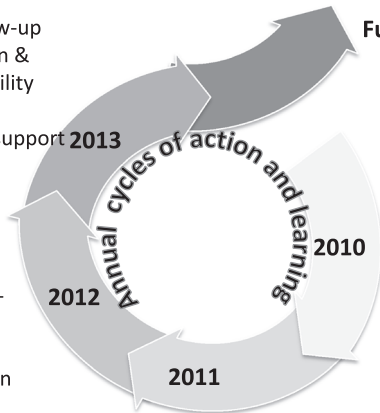

**Future years**

Situation analysis:  
mapping governance structures, processes, challenges & opportunities

Activities:

1. Community profiling to role-model population orientation
2. Understanding PHC facility managers' identity transition
